# Supplementary material for: Low-temperature highly selective Kolbe electrolysis of acetic acid in bio-oil on a stable in situ grown RuO2/TiO2 at industrial-level current
Source: Royal Society of Chemistry journal article supplement (doi:10.1039/d5ee01214g), 2025-01-01
Supplement: d5ee01214g1.pdf [file d5ee01214g1.pdf]

## Supplementary Information

### Low-temperature Highly Selective Kolbe Electrolysis of Acetic Acid in Bio-oil on a Stable *In-Situ* Grown RuO<sub>2</sub>/TiO<sub>2</sub> at Industrial-level Current

Yangxin Jin<sup>1,2</sup>, Shengqin Liu<sup>1,2</sup>, Zhe Wang<sup>1</sup>, Qi Zhu<sup>1,2</sup>, Qingguo Le<sup>1,2</sup>, Shan Shao<sup>1,2</sup>, Sam H.-Y. Hsu<sup>1,3</sup>, Anqing Zheng<sup>5</sup>, Jun Zhao<sup>4</sup>, Jason Chun-Ho Lam<sup>1,2\*</sup>

<sup>1</sup>*School of Energy and Environment, City University of Hong Kong, Kowloon Tong, Hong Kong SAR, China.*

<sup>2</sup>*State Key Laboratory of Marine Pollution (SKLMP), City University of Hong Kong, Kowloon Tong, Hong Kong SAR, China.*

<sup>3</sup>*Department of Materials Science and Engineering, City University of Hong Kong, Kowloon Tong, Hong Kong SAR, China.*

<sup>4</sup>*Department of Biology, Institute of Bioresource and Agriculture, Hong Kong Baptist University, Hong Kong SAR, China.*

<sup>5</sup>*CAS Key Laboratory of Renewable Energy, Guangzhou Institute of Energy Conversion, Chinese Academy of Sciences, Guangzhou, China.*

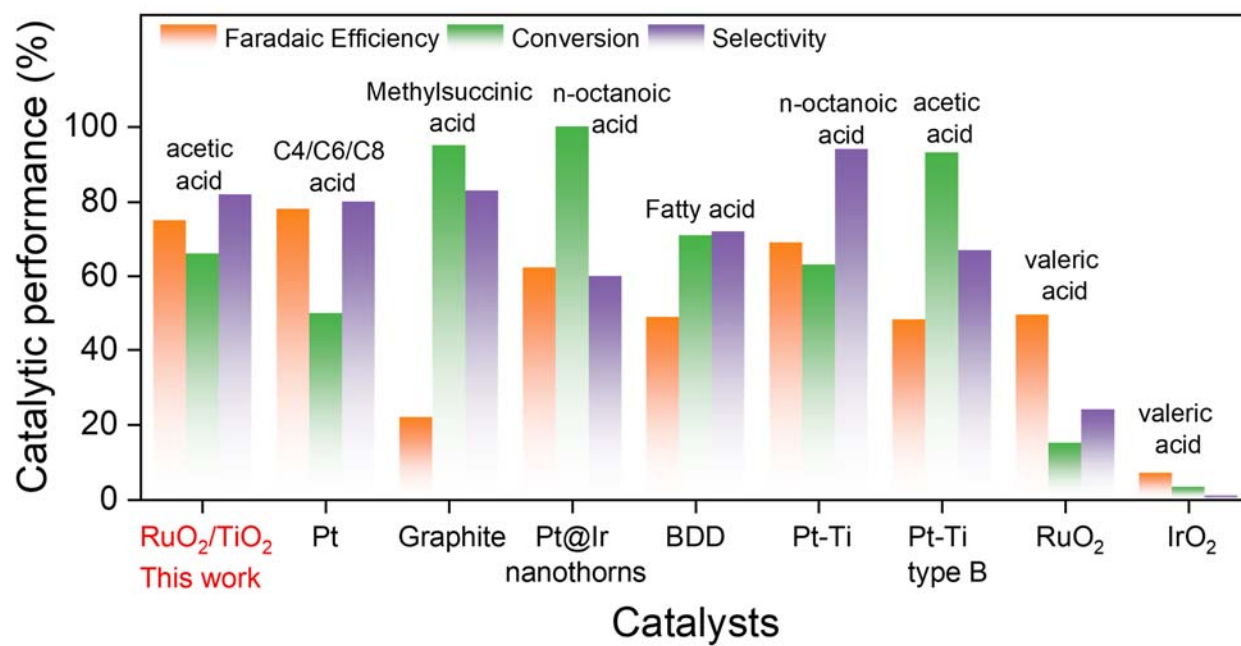

**Fig. S1.** Catalytic performance comparison of the state-of-the-art catalysts that applied in KBE.

Table S1. Comparison of various applied anode materials that applied in KBE

| Entry | Anode                                          | Optimized condition                                                    | FE (%)  | Con. (%) | Sel. (%) | Stability | Ref.          |
|-------|------------------------------------------------|------------------------------------------------------------------------|---------|----------|----------|-----------|---------------|
| 1     | RuO <sub>2</sub> /TiO <sub>2</sub> (This work) | 150 mA cm <sup>-2</sup> , ~1.0 M Acetic Acid, pH 4.6, 5°C              | ~75     | 66       | 82       | > 150 h   | -             |
| 2     | Pt                                             | 3 V vs. Ag/AgCl, 70-80 mA cm <sup>-2</sup> , ~1.0 M C4/C6/C8, pH 9-9.5 | 78.1    | 25-50    | 20-80    | 5~6 h     | <sup>1</sup>  |
| 3     | Multiscale structural Pt                       | 30 wt% Stearic acid, 80°C, 10V                                         | -       | -        | -        | > 8.3 h   | <sup>2</sup>  |
| 4     | Graphite                                       | 0.8 M Methylsuccinic acid, pH 5.7, 60°C, 95                            | 22      | >95      | 83       | 3 h       | <sup>3</sup>  |
| 5     | Pt@Ir Nanothorn                                | 0.5 M n-octanoic acid, pH 14, 250 mA cm <sup>-2</sup> , ~50°C          | 62.3    | ~100     | > 60     | 5 cycles  | <sup>4</sup>  |
| 6     | Pt-Ti (Platinized Titanium)                    | 1.0 M Fatty acid, pH 6.2, 30-72°C, 300 mA cm <sup>-2</sup>             | 24-53   | 50-71    | 48-80    | -         | <sup>5</sup>  |
| 7     | BDD                                            | 1.0 M Fatty acid, pH 6.2, 30-72°C, 300 mA cm <sup>-2</sup>             | 45-49   | 52-71    | 66-72    | -         | <sup>5</sup>  |
| 8     | Pt-Ti (Platinized Titanium)                    | 1.0 M n-octanoic acid, pH 10-10.5, 480 mA cm <sup>-2</sup> , 20 °C     | 69      | 63       | 92-94    | ~4 h      | <sup>6</sup>  |
| 9     | Pt-Ti (Type B)                                 | 1.0 M Acetic acid, pH 7.0, 150 mA cm <sup>-2</sup>                     | 48.3    | 93.1     | 66.9     | ~1000 h   | <sup>7</sup>  |
| 10    | Carbon electrode                               | 1 wt% Acetic acid, 10–30 °C, 29V                                       | 0.7-2.3 | 11.8     | 21       | 8 h       | <sup>8</sup>  |
| 11    | RuO <sub>2</sub> nanopartic                    | 0.5 M valeric acid, 4.5 V vs. RHE, pH 6.0, 0°C                         | 85.4    | -        | 31.3     | 6 h       | <sup>9</sup>  |
| 12    | RuO <sub>2</sub> thin films                    | 0.5M valeric acid, pH 5, 15-20 °C, 50 mA cm <sup>-2</sup>              | 49.7    | 15.2     | 24.1     | -         | <sup>10</sup> |
| 13    | IrO <sub>2</sub> thin films                    | 0.5M valeric acid, pH 5, 15-20 °C, 50 mA cm <sup>-2</sup>              | 7.1     | 3.4      | 0        | -         | <sup>10</sup> |

Note: Not all the stability measurement of these reported materials has been investigated in their work.

By comparing recent related studies on Kolbe electrolysis since 2010, we found that platinum-based materials are still the main anode materials used and the catalytic performance (based on Faraday efficiency, selectivity and conversion) is relatively stable, carbon-based materials such as graphite and BDD also exhibit promising applications, and the catalytic performance of metal oxides such as RuO<sub>2</sub> and IrO<sub>2</sub> still needs to be improved. Unfortunately, most of the research work has not paid much attention to the stability of the catalysts, so no comparison is made here.

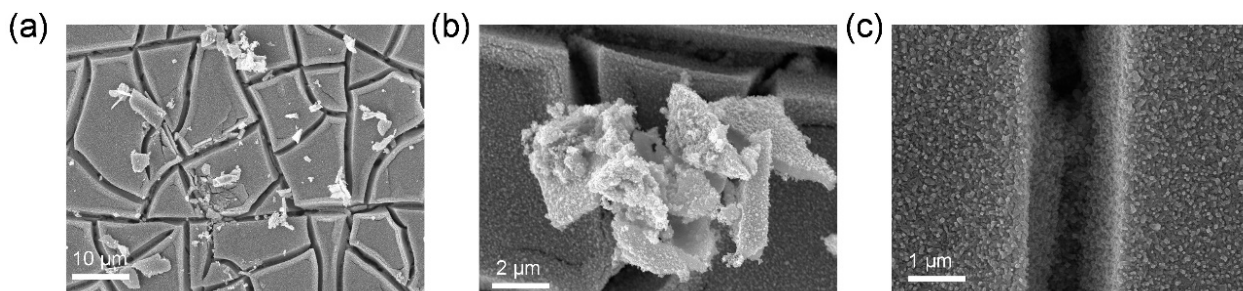

**Fig. S2.** SEM images of the RuO<sub>2</sub>/TiO<sub>2</sub> electrode.

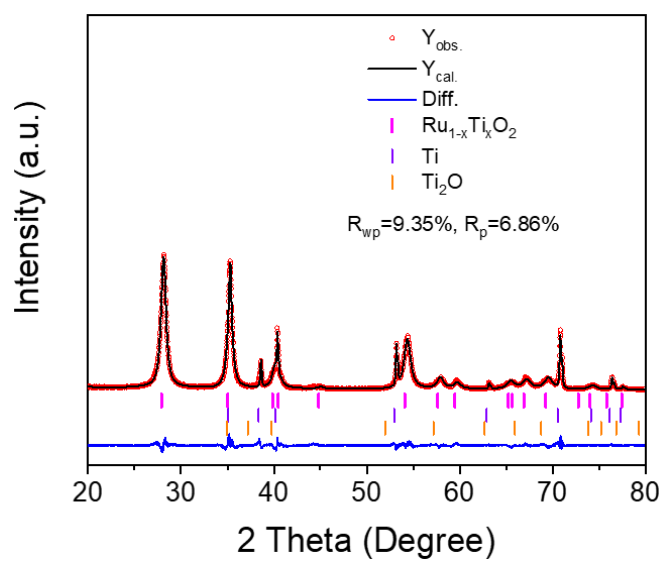

**Fig. S3.** XRD pattern and fitting analysis of the RuO<sub>2</sub>/TiO<sub>2</sub> electrode surface.  $Y_{obs.}$  is the obtained experimental value,  $Y_{cal.}$  is the calculated value, the blue line indicates the difference between the  $Y_{obs.}$  and  $Y_{cal.}$ , and the vertical dashes of different colors indicate the Bragg's position.

**Table S2.** The Rietveld refinement results of RuO<sub>2</sub>/TiO<sub>2</sub>

| Chemical formula   |                          | Ru <sub>0.971</sub> Ti <sub>0.029</sub> O <sub>2</sub> | Ti          | Ti <sub>2</sub> O    |
|--------------------|--------------------------|--------------------------------------------------------|-------------|----------------------|
| Relative content % |                          | 65.93                                                  | 32.88       | 1.18                 |
| Space group        |                          | P42/mnm                                                | P63/mmc     | P-3m1                |
| Cell parameters    | a (Å)                    | 4.52084 (50)                                           | 2.95202(34) | 2.96176              |
|                    | b (Å)                    | 4.52084 (50)                                           | 2.95202(34) | 2.96176              |
|                    | c (Å)                    | 3.10645 (50)                                           | 4.68948(51) | 4.8301               |
|                    | α (°)                    | 90                                                     | 90          | 90                   |
|                    | β (°)                    | 90                                                     | 90          | 90                   |
|                    | γ (°)                    | 90                                                     | 120         | 120                  |
|                    | Volume (Å <sup>3</sup> ) | 63.490(17)                                             | 35.3910(90) | 36.693               |
| Fitting index      |                          | R <sub>wp</sub> = 9.35%<br>R <sub>p</sub> = 6.86%      | GOF= 1.73   | χ <sup>2</sup> =2.99 |

R<sub>p</sub>: Profile R factor, R<sub>wp</sub>: Weighted R factor, χ<sup>2</sup>: Goodness factor. The Rietveld refinement analysis is a typical technique described by Hugo Rietveld for the application during the characterization of crystalline materials. In the case, the values of R<sub>wp</sub> factor is lower than 10% which confirm the suitable peaks fitting and convincing refinement.<sup>11</sup>

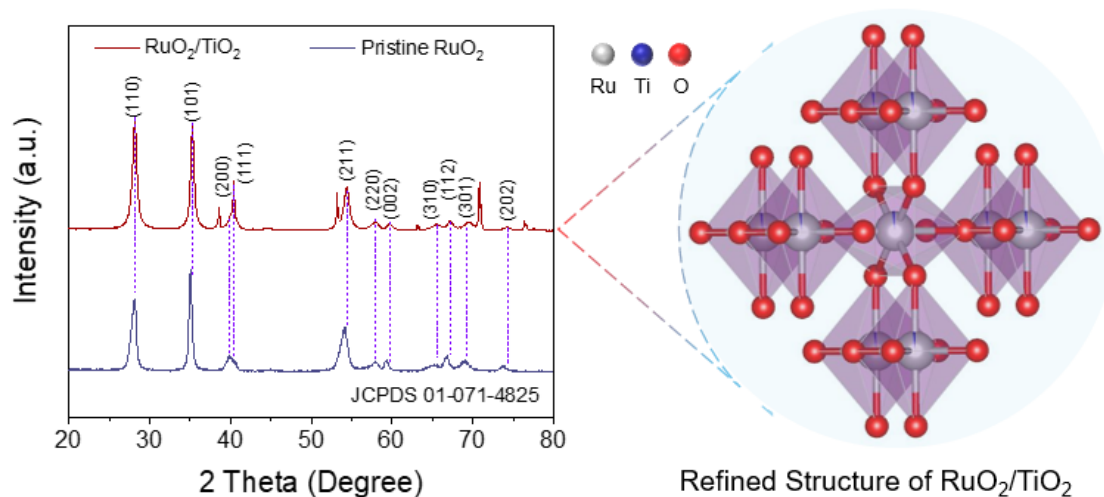**Fig. S4.** The XRD patterns of RuO<sub>2</sub>/TiO<sub>2</sub> and pristine RuO<sub>2</sub>, and the refined structure of RuO<sub>2</sub>/TiO<sub>2</sub>.

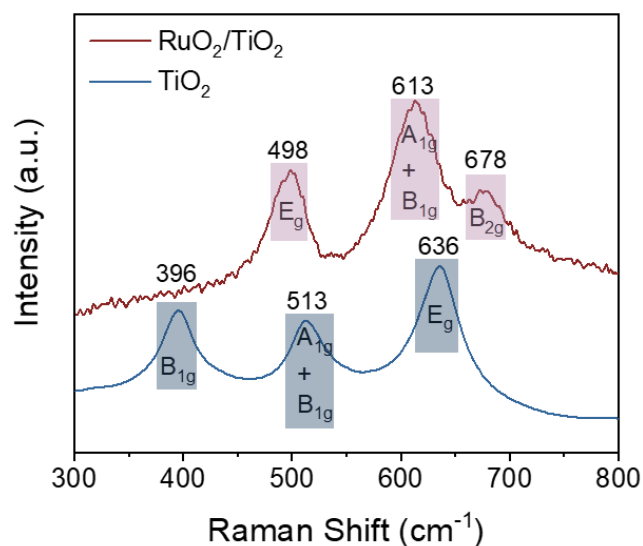

**Fig. S5.** Raman spectra of RuO<sub>2</sub>/TiO<sub>2</sub> and calcinated Ti (TiO<sub>2</sub>).

**Table S3.** Binding energy of the Ru, Ti, O in the characterized materials.

| Catalysts                               | Binding energy of Ti (eV) |        | Binding energy of Ru (eV) |               |               |               | Binding energy of O (eV) |                |                       |
|-----------------------------------------|---------------------------|--------|---------------------------|---------------|---------------|---------------|--------------------------|----------------|-----------------------|
|                                         | 2p 3/2                    | 2p 1/2 | 3p 3/2 (Sat)              | 3p 1/2 (Sat)  | 3d 5/2 (Sat)  | 3d 3/2 (Sat)  | Ti (Ru)O <sub>2</sub>    | Ads. OH        | Ads. H <sub>2</sub> O |
| Calcinated Ti sheet (TiO <sub>2</sub> ) | 458.6                     | 464.3  | /                         | /             | /             | /             | 529.7 (39.2 %)           | 531.0 (59.0 %) | 532.8 (1.8%)          |
| RuO <sub>2</sub> /TiO <sub>2</sub>      | 458.2                     | 463.8  | 462.0 (464.3)             | 484.4 (487.5) | 280.5 (282.2) | 284.7 (286.4) | 529.0 (49.1 %)           | 530.1 (24.3 %) | 531.6 (26.6 %)        |
| Pristine RuO <sub>2</sub>               | /                         | /      | 462.3 (464.3)             | 484.7 (487.8) | 280.7 (282.3) | 284.9 (286.6) | 529.2 (42.1 %)           | 530.2 (25.8 %) | 531.7 (32.1 %)        |

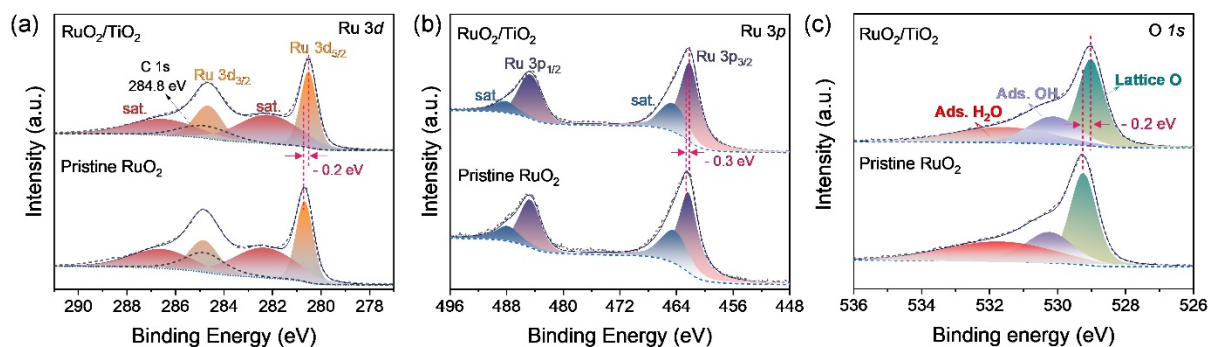

**Fig. S6.** High resolution spectra of (a) Ru 3d, (b) Ru 3p and (c) O 1s in pristine RuO<sub>2</sub> and synthesized RuO<sub>2</sub>/TiO<sub>2</sub>.

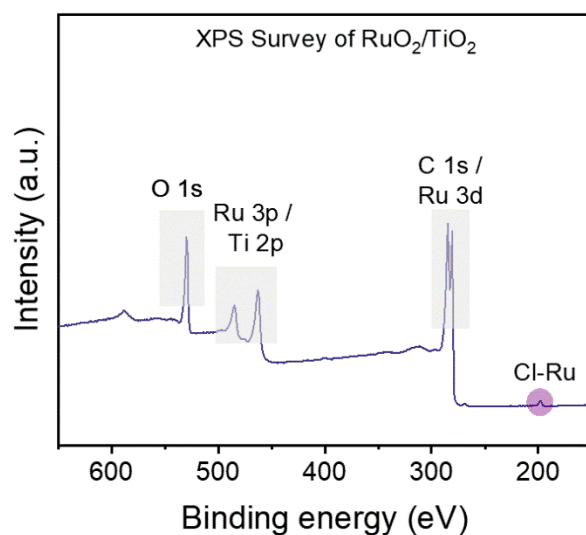

Fig. S7. XPS scan survey of RuO<sub>2</sub>/TiO<sub>2</sub>.

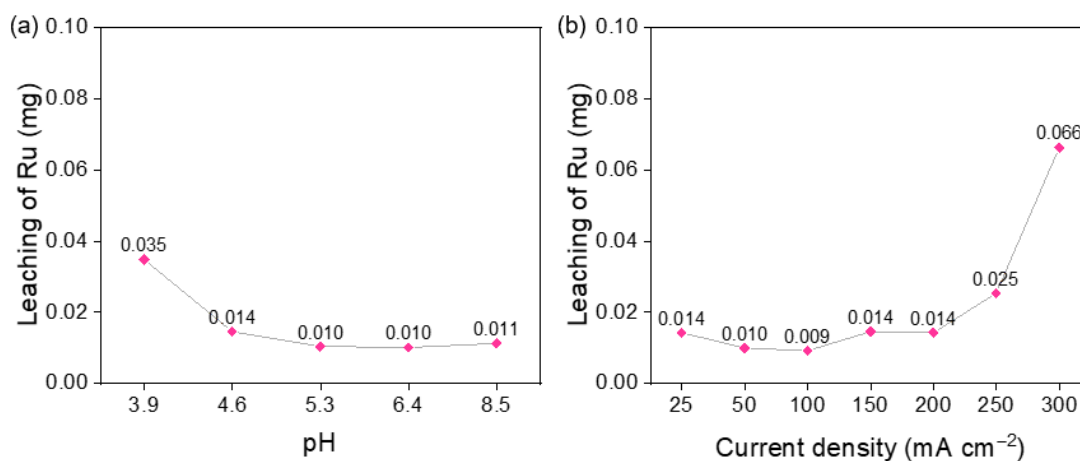

Fig. S8. ICP analysis of the solution after KBE in different pH (a) and current densities (b).

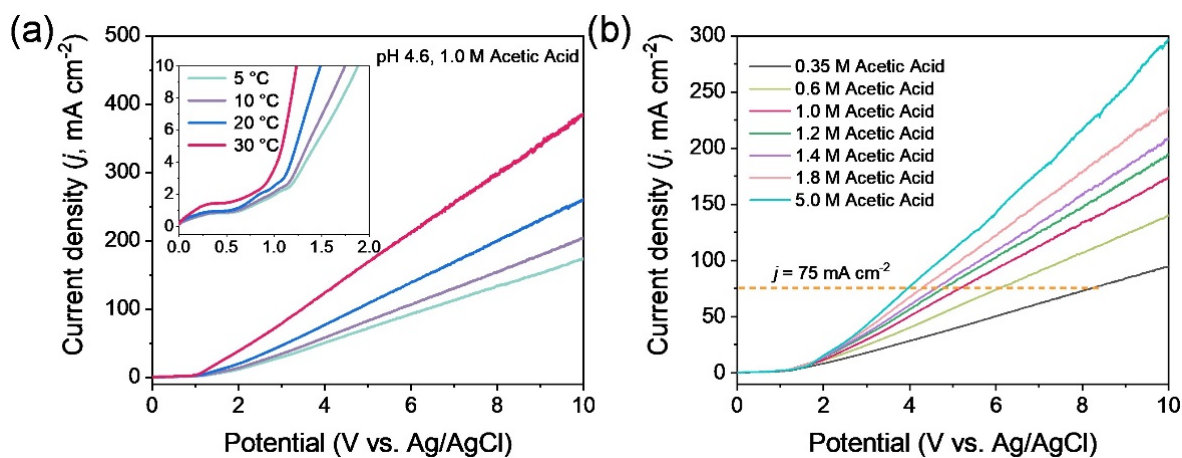

Fig. S9. (a) LSV curves of RuO<sub>2</sub>/TiO<sub>2</sub> at different temperature. (b) LSV curves of RuO<sub>2</sub>/TiO<sub>2</sub> in various concentration of acetic acid at 5 °C. LSVs are recorded with scan rate of 50 mV/s at stirring speed of 900 rpm.

**Table S4.** Specifications of the electrolyte properties used in the LSV studies and the KBE experiments.

| Solution condition                                      | CH <sub>3</sub> COOH (mol/L) | NaCH <sub>3</sub> COO (mol/L) | Conductivity (ms) | Initial pH | pH after KBE |
|---------------------------------------------------------|------------------------------|-------------------------------|-------------------|------------|--------------|
| 0.35M Acetic Acid electrolyte                           | 0.175                        | 0.175                         | 13.7              | 4.6        | 8.9          |
| 0.6M Acetic Acid electrolyte                            | 0.3                          | 0.3                           | 19.5              | 4.6        | 9.1          |
| 1.0M Acetic Acid electrolyte @150mA cm <sup>-2</sup>    | 0.2                          | 0.8                           | 42.5              | 5.3        | 10.0         |
| 1.0M Acetic Acid electrolyte @150mA cm <sup>-2</sup>    | 0.82                         | 0.18                          | 12.2              | 3.9        | 4.8          |
| 1.0M Acetic Acid electrolyte @150mA cm <sup>-2</sup>    | -                            | 1.0                           | 49.9              | 8.3        | 9.2          |
| 1.0M Acetic Acid electrolyte @150mA cm <sup>-2</sup>    | 0.5                          | 0.5                           | 30.7              | 4.6        | 9.3          |
| 1.2M Acetic Acid electrolyte @150mA cm <sup>-2</sup>    | 0.6                          | 0.6                           | 33.7              | 4.6        | 9.1          |
| 1.4M Acetic Acid electrolyte @150mA cm <sup>-2</sup>    | 0.7                          | 0.7                           | 36.9              | 4.6        | 9.3          |
| 1.8M Acetic Acid electrolyte @150mA cm <sup>-2</sup>    | 0.9                          | 0.9                           | 45.7              | 4.6        | 9.5          |
| 1.0M Acetic Acid electrolyte @150mA cm <sup>-2</sup>    | 0.02                         | 0.98                          | 51.7              | 6.4        | 9.1          |
| Crude Bio-oil                                           | ~1.4                         | -                             | 1.3               | 2.3~2.4    | -            |
| 1.5M AA                                                 | 1.5                          | -                             | 1.2               | 2.4        | -            |
| ~1.5M aqueous-extracted bio-oil @150mA cm <sup>-2</sup> | ~0.7                         | ~0.7                          | 35.1              | 4.2        | 8.9          |



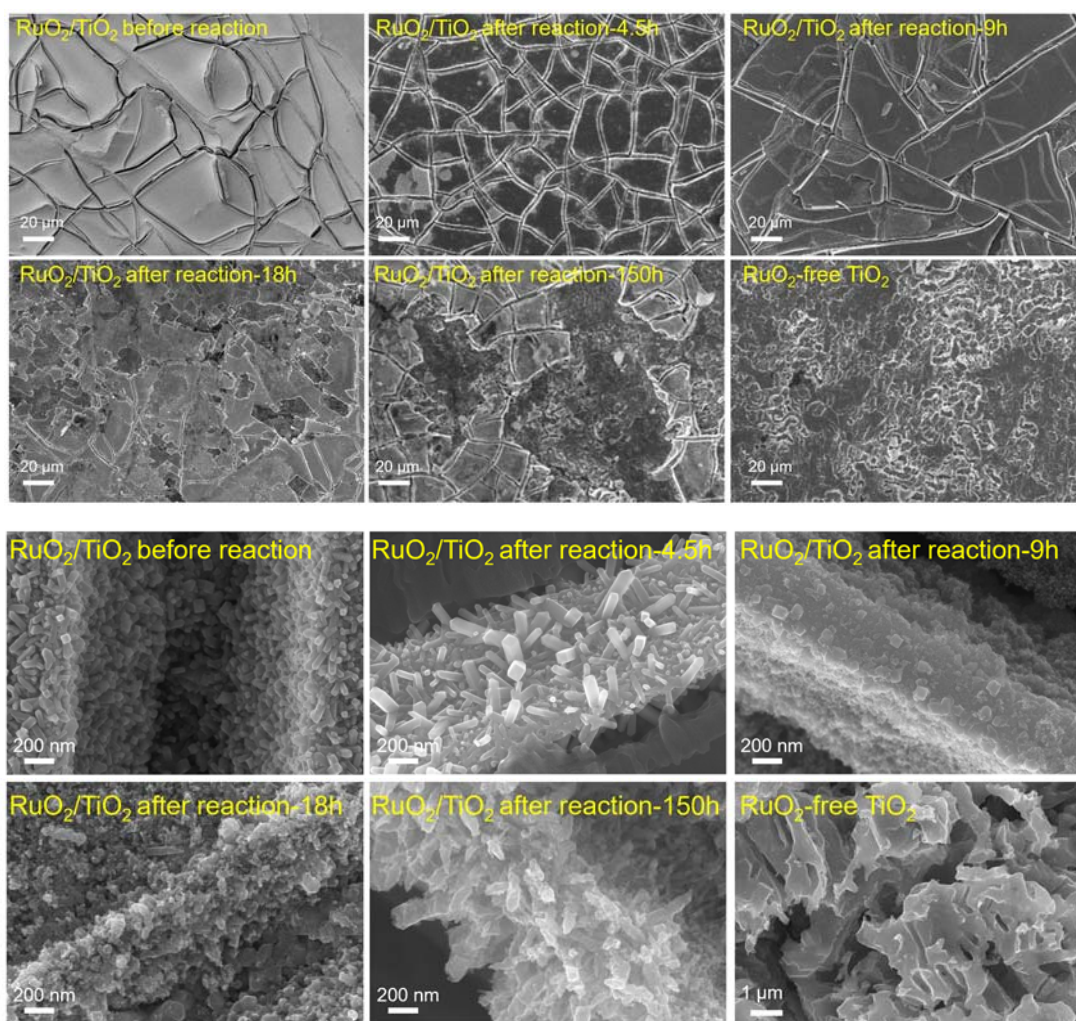

**Fig. S10.** SEM images of the RuO<sub>2</sub>/TiO<sub>2</sub> electrode before reaction, after different reaction duration (4.5h, 9h, 18h and 150h) and RuO<sub>2</sub>-free TiO<sub>2</sub>.

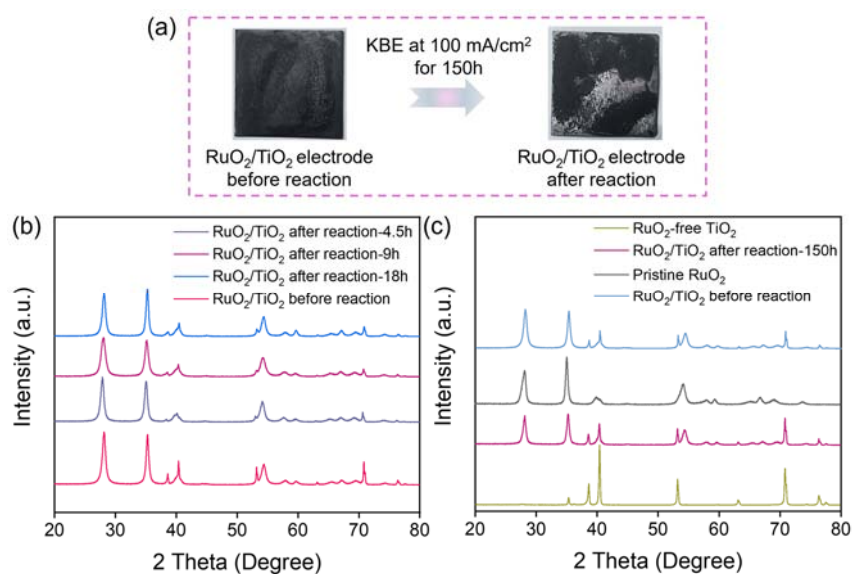

**Fig. S11.** (a) Comparison of the RuO<sub>2</sub>/TiO<sub>2</sub> electrode before and after reaction. (b-c) XRD patterns of the RuO<sub>2</sub>/TiO<sub>2</sub> electrodes before and after different reaction durations (4.5h, 9h, 18h, 150h).

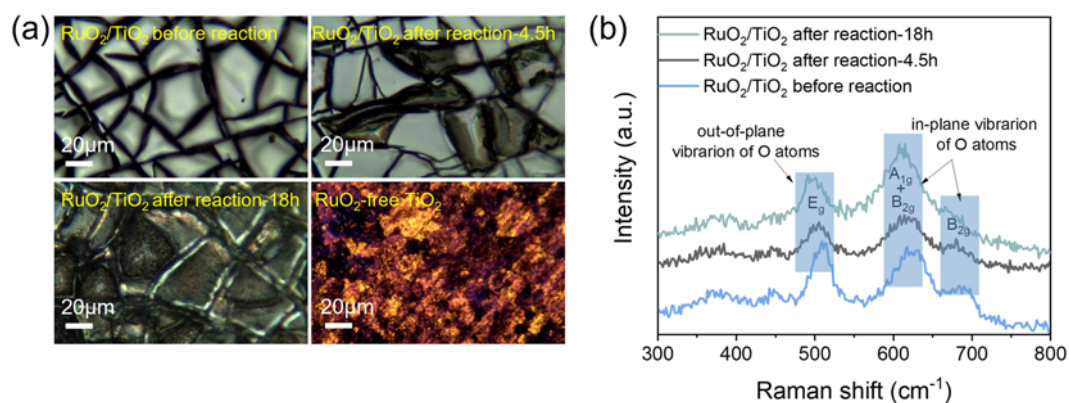

**Fig. S12.** (a) Comparison of the RuO<sub>2</sub>/TiO<sub>2</sub> electrode and TiO<sub>2</sub> surface by Raman-photo before and after reaction. (b) Raman spectra of the RuO<sub>2</sub>/TiO<sub>2</sub> electrodes before and after different reaction durations (4.5h, 18h).

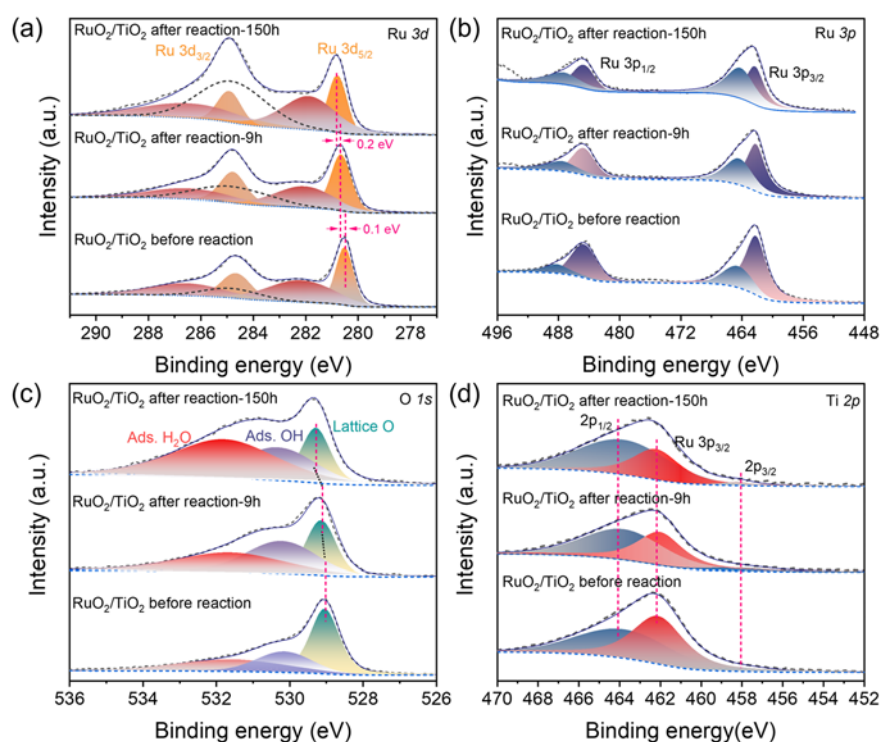

**Fig. S13.** XPS spectra of (a) Ru 3d, (b) Ru 3p, (c) O 1s and (d) Ti 2p in pristine synthesized RuO<sub>2</sub>/TiO<sub>2</sub> before and after reaction.

**Table S5.** Binding energy of the Ru, Ti, O in the characterized materials.

| Catalysts                                            | Binding energy of Ti (eV) |        | Binding energy of Ru (eV) |               |               |               | Binding energy of O (eV) |               |                       |
|------------------------------------------------------|---------------------------|--------|---------------------------|---------------|---------------|---------------|--------------------------|---------------|-----------------------|
|                                                      | 2p 3/2                    | 2p 1/2 | 3p 3/2 (Sat)              | 2p 1/2 (Sat)  | 3d 5/2 (Sat)  | 3d 3/2 (Sat)  | Ti (Ru)O <sub>2</sub>    | Ads. OH       | Ads. H <sub>2</sub> O |
| RuO <sub>2</sub> /TiO <sub>2</sub> before            | 458.2                     | 463.8  | 462.0 (464.3)             | 484.4 (487.5) | 280.5 (282.2) | 284.7 (286.4) | 529.0 (49.1%)            | 530.1 (24.3%) | 531.6 (26.6%)         |
| RuO <sub>2</sub> /TiO <sub>2</sub> after reaction-9h | 458.2                     | 463.8  | 462.1 (464.3)             | 484.7 (487.5) | 280.7 (282.1) | 284.8 (286.5) | 529.1 (27.3%)            | 530.2 (35.1%) | 531.6 (37.6%)         |
| RuO <sub>2</sub> /TiO <sub>2</sub> after reaction-   | 458.2                     | 463.8  | 462.2 (464.1)             | 484.6 (487.3) | 280.8 (281.9) | 284.9 (286.4) | 529.3 (20.6%)            | 530.3 (28.0%) | 531.8 (51.4%)         |

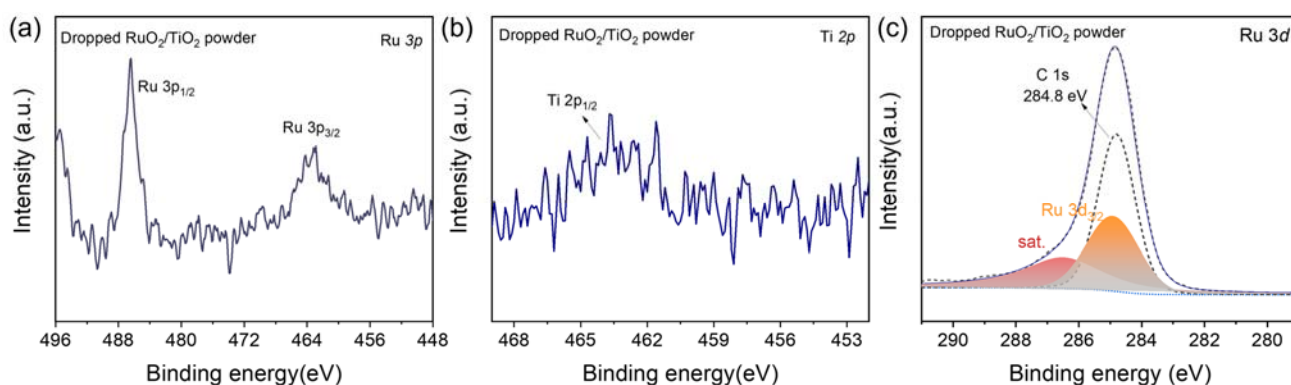

**Fig. S14.** XPS spectra of (a) Ru 3p, (b) Ti 2p and (c) Ru 3d in the dropped RuO<sub>2</sub>/TiO<sub>2</sub> powder after reaction.



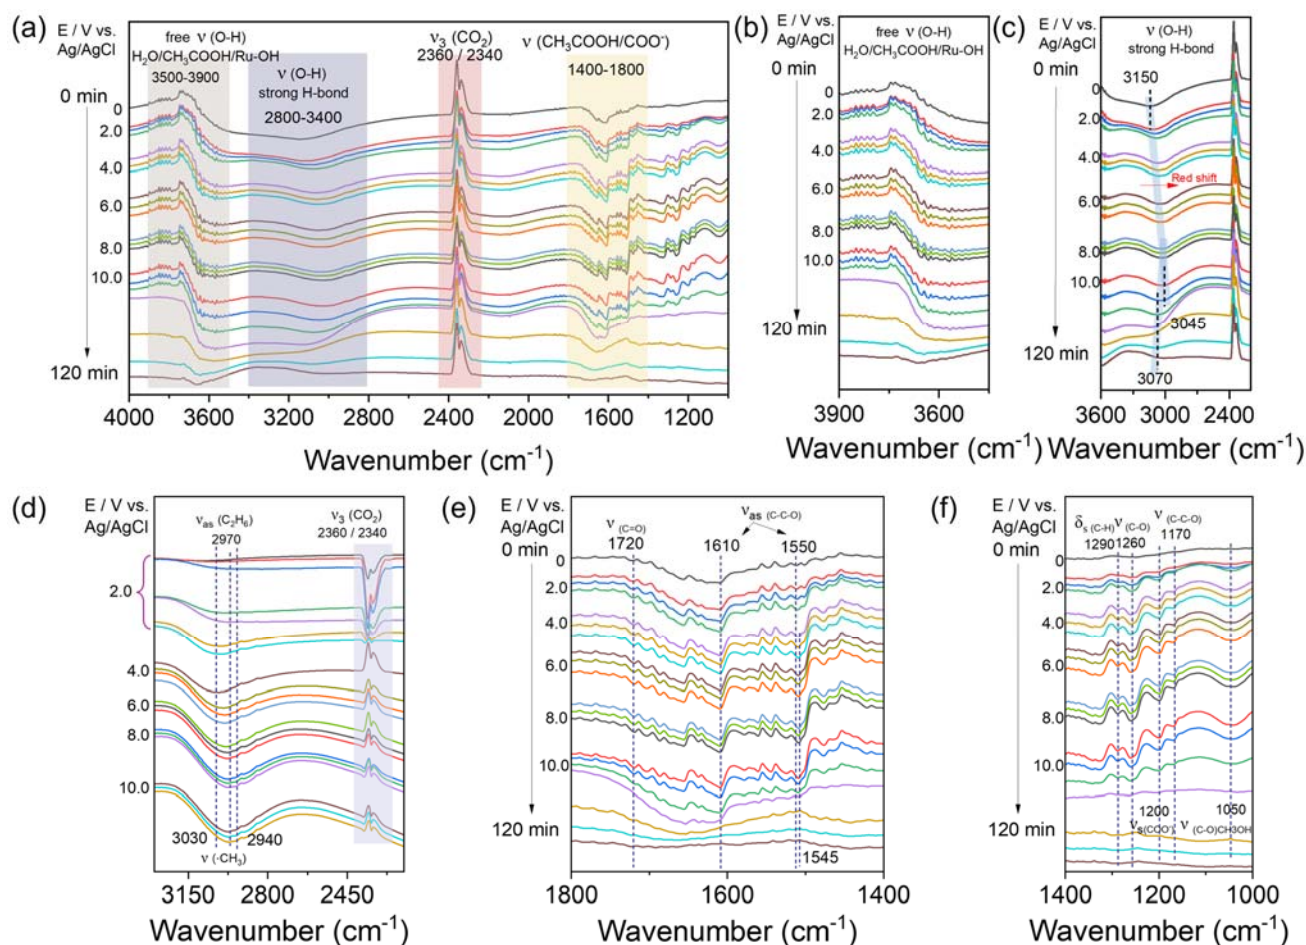

**Fig. S15.** *In-situ* electrochemical ATR-FTIR spectra. (a) Selected *in-situ* ATR-FTIR spectra of Kolbe electrolysis of AA over RuO<sub>2</sub>/TiO<sub>2</sub> based on stepwise switching the potential from 0 V to −10 V (vs. Ag/AgCl). (b, c, e, f) Comparison of different region with the change of potential and time. (d) Differential spectrum analysis.

The Kolbe electrolysis of acetic acid can be divided into three steps: Step 1 is the dissociation of acetic acid to yield an acetate anion. Step 2 is the oxidative electrolysis of carboxyl group, which oxidize the acetate anion to acetate radical. The carboxyl radical can rearrange to liberate a CO<sub>2</sub>, breaking the internal C-C bond and leave behind a methyl radical ( $\cdot\text{CH}_3$ ). Step 3 is the coupling of  $\cdot\text{CH}_3$  to form ethane (C<sub>2</sub>H<sub>6</sub>). To investigate the reaction mechanism, *in-situ* ATR-FTIR was applied to monitor the reaction process by switching potentials.

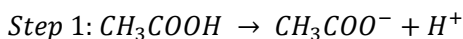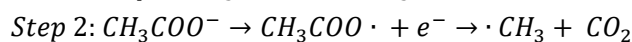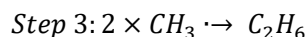

The adsorption and Kolbe oxidation of acetic acid on RuO<sub>2</sub>/TiO<sub>2</sub> is presented in **Fig. S15a**. The region of 3500-3900 cm<sup>-1</sup> (**Fig. S15b**) with weak signals is assigned to the vibration of free O-H or weak hydrogen bond (v(O-H)) of molecular CH<sub>3</sub>COOH, H<sub>2</sub>O and surface hydroxyl groups (M-OH).<sup>12</sup> It can be observed that with increasing applied potential (0–10 V vs. Ag/AgCl), these peaks gradually diminish in intensity and eventually flatten. This is because as Kolbe electrolysis proceeds, acetic acid (CH<sub>3</sub>COOH) is consumed, reducing the availability of H-bond donors (Step 1). Simultaneously, we observed a red shift from 3150 cm<sup>-1</sup> to 3045 cm<sup>-1</sup> and then shift back to 3070 cm<sup>-1</sup> as the potential increases (**Fig. S15c**), and this broad peak gets stronger and then fades away. This might be due to the decarboxylation (CH<sub>3</sub>COO<sup>-</sup> →  $\cdot\text{CH}_3$  + CO<sub>2</sub>), weakening O-H $\cdots$ O hydrogen bonds (step 2). And the produced intermediates like  $\cdot\text{CH}_3\text{COO}^-$  or  $\cdot\text{CH}_3$  radicals adsorb on RuO<sub>2</sub>, disrupting the original H-bond network. The results

of the differential spectral analysis corroborate this viewpoint, as shown in **Fig. S15d**. An increasing signal at  $2970\text{ cm}^{-1}$  that belong to  $\nu(\text{CH}_3)$  of  $\text{C}_2\text{H}_6$  was observed (Step 3)<sup>13</sup> additionally, transient peaks at  $3030$  and  $2940\text{ cm}^{-1}$  suggest the involvement of methyl radical ( $\cdot\text{CH}_3$ ) intermediates.<sup>14</sup> The presence of  $\cdot\text{CH}_3$  was also confirmed with our spin-trap reagent-added electrolysis shown later. Also, the change of  $\text{CO}_2$  signal at  $2340$  and  $2360\text{ cm}^{-1}$  suggests that  $\text{CO}_2$  is rapidly generated and accumulated from  $0$ - $2\text{ V}$ , which is consistent with the Kolbe decarboxylation reaction (Step 2), where the generated  $\text{CO}_2$  saturates the interface and escapes as bubbles. Moreover, the signal at  $1720\text{ cm}^{-1}$  assigned to the carbonyl group vibration  $\nu(\text{C}=\text{O})$  of acetic acid,  $1610$  and  $1550\text{ cm}^{-1}$  belong to the anti-symmetric vibration of acetate  $\nu(\text{C}-\text{C}-\text{O})$  were also observed, their signal intensities both increased and then decreased, attributed to the adsorption of acetic acid on the electrode surface followed by gradual consumption (**Fig. S15e**).<sup>15</sup> Additionally, characteristic signals belong to adsorbed acetate were also detected. As shown in Fig. S15e,  $1260\text{ cm}^{-1}$  corresponds to the C-O vibration of adsorbed state acetate ( $\text{CH}_3\text{COO}^-$ ),  $1290\text{ cm}^{-1}$  to the symmetric deformation vibration of  $\text{CH}_3$  ( $\delta_s \text{CH}_3$ )  $1200\text{ cm}^{-1}$  to the symmetric stretching vibration of  $\text{COO}^-$  ( $\nu_s \text{COO}^-$ ),  $1170\text{ cm}^{-1}$  corresponds to C-C-O stretching vibration<sup>16</sup> Their signal changes are also generally consistent with the process of the Kolbe reaction. Moreover, the observation of  $1050\text{ cm}^{-1}$  corresponds to C-O stretching vibration might due to the formation of methanol. Overall, based on the *in-situ* ATR-FTIR technique, we verified the Kolbe oxidation process based on 3 steps as described above. Furthermore, to confirm the methyl radical formation during the reaction, we also conducted a radical-trapping control experiment by using TEMPO when running Kolbe oxidation.

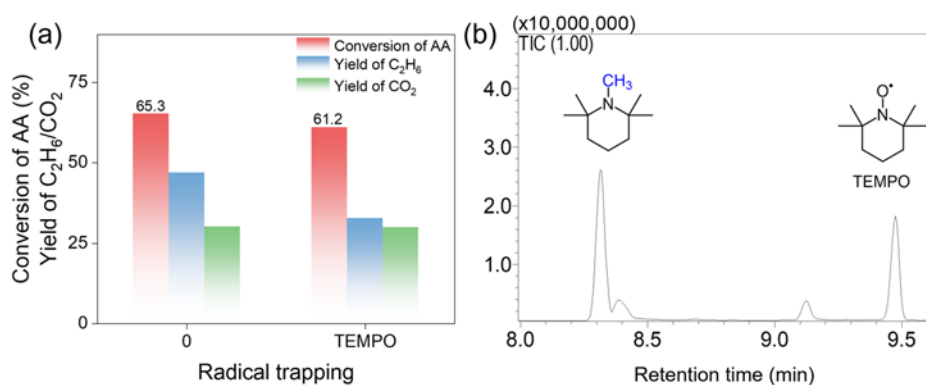

**Fig. S16.** (a) Obtained KBE reaction result by radical-trapping control experiment, (b) TIC (Total Ion Chromatography) of the TEMPO-trapped molecule.

Based on the results, we found that the addition of TEMPO did not significantly affect the conversion of acetic acid ( $<5\%$ ) or the  $\text{CO}_2$  yield, but the yield of ethane was significantly reduced, and we also found evidence of the capture of methyl radicals based on GC-MS analysis. This result confirms the decarboxylation step outlined in step 2 still occurred in the presence of TEMPO, but the resulting  $\cdot\text{CH}_3$  was trapped by TEMPO reagent, which diminished the  $\text{C}_2\text{H}_6$  yield. The trapped spin-trapped product, e.g. methylated TEMPO, was also detected in GC-MS.

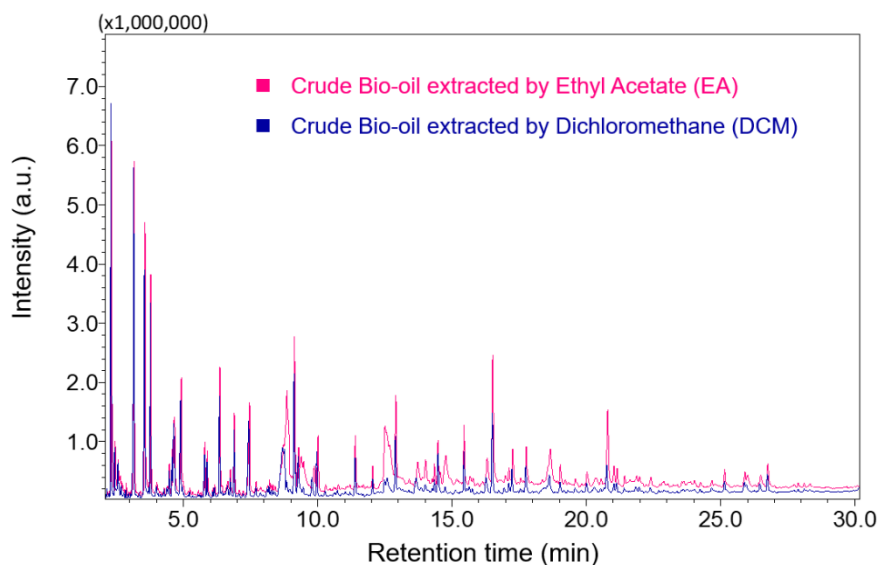

**Fig. S17.** TIC (Total Ion Chromatography) of crude bio-oil extracted by EA and DCM.

**Table S6.** GC/MS chromatogram major compounds in the crude bio-oil.

| Item | Retention time (min) | Chemical                      | Similarity (%) |
|------|----------------------|-------------------------------|----------------|
| 1    | 0.96                 | Methanol                      | 98             |
| 2    | 1.04                 | Acetone                       | 98             |
| 3    | 1.09                 | Methyl acetate                | 97             |
| 4    | 1.55                 | Hydroxy acetone               | 96             |
| 5    | 1.99                 | Propanoic acid                | 96             |
| 6    | 2.03                 | 4-Methyl-2-pentanol           | 89             |
| 7    | 2.31                 | 1-Hydroxy-2-butanone          | 98             |
| 8    | 2.45                 | Succi dialdehyde              | 91             |
| 9    | 2.56                 | Cyclopentanone                | 93             |
| 10   | 2.66                 | Butanoic acid                 | 91             |
| 11   | 2.96                 | 1-Hydroxy-3-methyl-2-butanone | 90             |
| 12   | 3.16                 | <b>Furfural</b>               | 90             |
| 13   | 3.56                 | 2-Furanmethanol               | 95             |
| 14   | 3.78                 | Acetoxy acetone               | 98             |
| 15   | 4.01                 | Dihydro-2H- pyran-3(4H)-one   | 88             |
| 16   | 4.06                 | 4-Cyclopentene-1,3-dione      | 81             |
| 17   | 4.28                 | 4-Hydroxy-3-hexanone          | 83             |
| 18   | 4.47                 | 2-Cyclopenten-1-one           | 90             |
| 19   | 4.58                 | 2-Acetylfuran                 | 93             |
| 20   | 4.65                 | Gamma butyrolactone           | 95             |
| 21   | 4.92                 | Cyclohexanone                 | 88             |
| 22   | 5.01                 | 2-Cyclohexen-1-one            | 88             |
| 23   | 5.23                 | 5-Methyl-2(5H)-furanone       | 91             |

|    |       |                                        |    |
|----|-------|----------------------------------------|----|
| 24 | 5.34  | 3-Methyl-2,5-furandione                | 83 |
| 25 | 5.56  | 2,3-Dimethyl-1-pentanol                | 76 |
| 26 | 5.61  | 2-Hydroxy-gamma-butyrolactone          | 77 |
| 27 | 5.69  | 3-Methyl-4(3H)-pyrimidinone            | 73 |
| 28 | 5.79  | 4-Methyl-1-penten-3-ol                 | 78 |
| 29 | 5.89  | 2-Oxo-butyl acetate                    | 97 |
| 30 | 6.11  | Methyl 2-furoate                       | 93 |
| 31 | 6.16  | 3-Methyl-2(5H)-furanone                | 95 |
| 32 | 6.35  | <b>Phenol</b>                          | 98 |
| 33 | 6.52  | 3,4-Dimethylcyclopent-2-en-1-one       | 91 |
| 34 | 6.74  | 2,5-Dihydro-3,5-dimethyl-2-furanone,   | 93 |
| 35 | 6.89  | Tetrahydrofurfuryl alcohol             | 92 |
| 36 | 7.45  | 3-Methyl-1,2-cyclopentanedione         | 96 |
| 37 | 7.71  | 2,3-Dimethyl-2-cyclopenten-1-one       | 91 |
| 38 | 7.88  | 4-Methyl-5H-furan-2-one                | 93 |
| 39 | 8.13  | Tetrahydro-3,6-dimethyl-2H-pyran-2-one | 83 |
| 40 | 8.20  | 3-Ethyl-2-hydroxy-2-cyclopenten-1-one  | 86 |
| 41 | 8.25  | 2-Methyl-phenol                        | 95 |
| 42 | 8.33  | 3,4-Hexanedione                        | 88 |
| 43 | 8.42  | 2-Acetylfuran                          | 82 |
| 44 | 8.72  | Allyl butyrate                         | 88 |
| 45 | 8.86  | 2-Oxo-n-valeric acid                   | 89 |
| 46 | 9.13  | <b>Guaiacol</b>                        | 96 |
| 47 | 9.29  | 4,5-Dimethyl-4-hexen-3-one             | 89 |
| 48 | 9.38  | Cyclobutanol                           | 85 |
| 49 | 9.87  | 3-Hydroxy-2-methyl-4H-pyran-4-one      | 94 |
| 50 | 10.01 | 3-Ethyl-2-hydroxy-2-cyclopenten-1-one  | 95 |
| 51 | 10.29 | 1, 4-(1-methylethyl)-cyclohexano       | 75 |
| 52 | 11.39 | 3-Ethyl-phenol                         | 97 |
| 53 | 12.04 | Creosol                                | 96 |
| 54 | 12.5  | <b>Catechol</b>                        | 90 |
| 55 | 12.91 | <b>2,3-Dihydrobenzofuran</b>           | 92 |
| 56 | 13.72 | Glyceryl alpha-monoacetate             | 90 |
| 57 | 14.01 | 3-Methoxy-1,2-benzenediol              | 96 |
| 58 | 14.35 | 1-(2,5-Dihydroxyphenyl)-ethanone       | 92 |
| 59 | 14.48 | 4-Ethyl-2-methoxy- phenol              | 92 |
| 60 | 14.77 | Hydroquinone                           | 86 |
| 61 | 15.45 | 2-Methoxy-4-vinylphenol                | 93 |
| 62 | 16.52 | <b>2,6-Dimethoxy-phenol</b>            | 92 |
| 63 | 16.99 | 4-Hydroxy-benzaldehyde                 | 96 |
| 64 | 17.76 | Vanillin                               | 96 |

|    |       |                                                       |    |
|----|-------|-------------------------------------------------------|----|
| 65 | 18.66 | Hexahydro-1,8(2H,5H)-naphthalenedione,                | 79 |
| 66 | 19.03 | 3,5-Dimethoxy-4-hydroxytoluene                        | 82 |
| 67 | 19.21 | 3-Methoxy-2-methyl-phenol                             | 81 |
| 68 | 20.03 | 2- Hydroxy-6-methoxyacetophenone                      | 78 |
| 69 | 20.79 | 2H-1-Benzopyran-2-one, 3,4-dihydro-6-hydroxy-         | 81 |
| 70 | 21.03 | 5-Tert-butylpyrogallol                                | 78 |
| 71 | 21.15 | 2-Propanone, 1-(4-hydroxy-3-methoxyphenyl)-           | 91 |
| 72 | 21.42 | 6-Methoxychroman-2-one                                | 75 |
| 73 | 21.98 | 4-ethenyl-2,6-dimethoxy-phenol                        | 85 |
| 74 | 22.4  | Methyl 3-(4-hydroxyphenyl) propionate                 | 85 |
| 75 | 24.68 | Methyl 3-(4-hydroxy-3-methoxyphenyl) propanoate       | 90 |
| 76 | 25.15 | (E)-2,6-Dimethoxy-4-(prop-1-en-1-yl) phenol           | 92 |
| 77 | 25.9  | 1-(4-Hydroxy-3,5-dimethoxyphenyl)- ethanone           | 93 |
| 78 | 26.01 | 2-Propanone, 1-hydroxy-3-(4-hydroxy-3-methoxyphenyl)- | 85 |
| 79 | 26.49 | 4-Methyldaphnetin                                     | 70 |
| 80 | 26.76 | Syringylacetone                                       | 96 |
| 81 | 27.89 | 1-(4-Hydroxy-3,5-dimethoxyphenyl)- 1-propanone        | 87 |
| 82 | 28.12 | 3-(4-Hydroxy-3-methoxyphenyl)-2-propenoic acid        | 90 |
| 83 | 30.57 | n-Hexadecanoic acid                                   | 94 |

These compounds are identified by comparing the mass spectra with the NIST17-1 library.

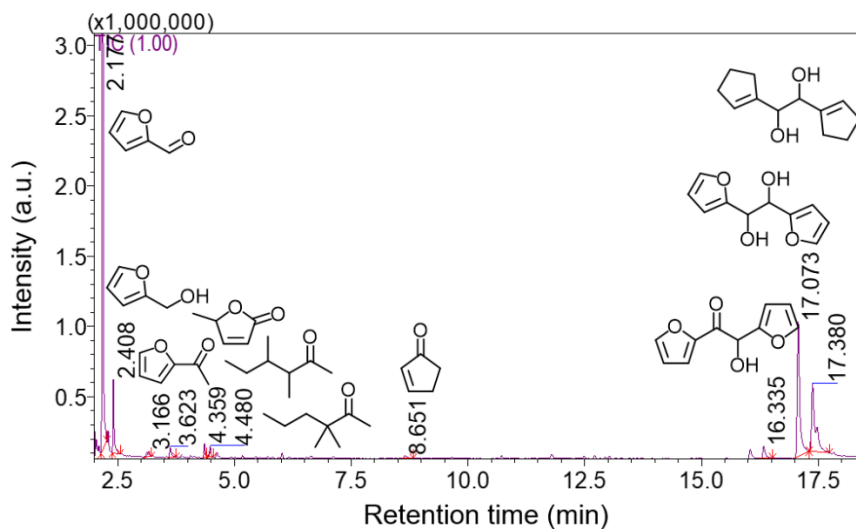

**Fig. S18.** TIC (Total Ion Chromatography) of KBE in the presence of furfural.



**Table S7.** GC/MS chromatogram analysis of major products after KBE in the presence of furfural.

| Item | Retention time (min) | Chemicals detected after KBE           | Similarity (%) |
|------|----------------------|----------------------------------------|----------------|
| 1    | 2.177                | Furfural                               | 97             |
| 2    | 2.408                | Furfuryl alcohol                       | 95             |
| 3    | 3.166                | 2-Acetylfuran                          | 93             |
| 4    | 3.623                | $\beta$ -Angelica lactone              | 96             |
| 5    | 4.359                | 3,3-Dimethyl-2-hexanone                | 89             |
| 6    | 4.480                | 3,4-Dimethyl-2-hexanone                | 88             |
| 7    | 8.651                | 2-Cyclopenten-1-one                    | 87             |
| 8    | 16.34                | 2,2-Furoin                             | 87             |
| 9    | 17.073               | 1,2-Bis(2-furanyl)ethane-1,2-diol      | 88             |
| 109  | 17.380               | 1,2-Di(1-cyclopentenyl)-1,2-ethanediol | 87             |

These compounds are identified by comparing the mass spectra with the NIST17-1 library.

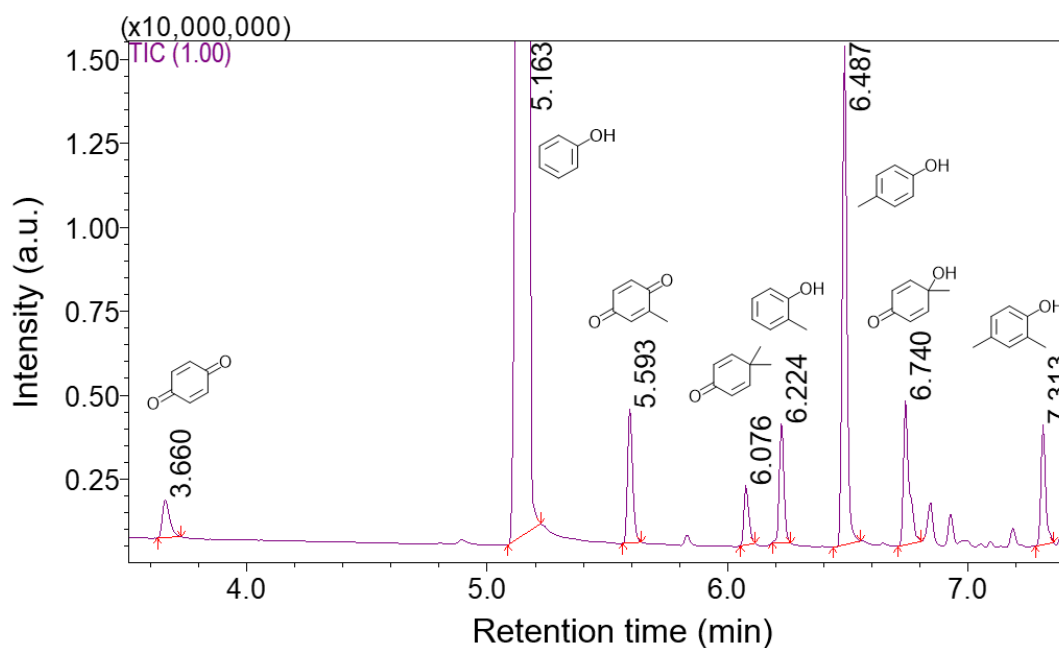

**Fig. S19.** TIC (Total Ion Chromatography) of KBE in the presence of phenol.

**Table S6.** GC/MS chromatogram analysis of major products after KBE in the presence of phenol.

| Item | Retention time (min) | Chemicals detected after KBE               | Similarity (%) |
|------|----------------------|--------------------------------------------|----------------|
| 1    | 3.660                | <i>p</i> -benzoquinone                     | 98             |
| 2    | 5.163                | Phenol                                     | 93             |
| 3    | 5.593                | 2-Methyl- <i>p</i> -benzoquinone           | 97             |
| 4    | 6.076                | 4,4-Dimethylcyclohexadienone               | 94             |
| 5    | 6.224                | 2-Methylphenol                             | 98             |
| 6    | 6.487                | <i>p</i> -Cresol                           | 98             |
| 7    | 6.740                | 4-Hydroxy-4-methylcyclohexa-2,5-dien-1-one | 84             |
| 8    | 7.313                | 2,4-Dimethylphenol                         | 98             |

These compounds are identified by comparing the mass spectra with the NIST17-1 library.

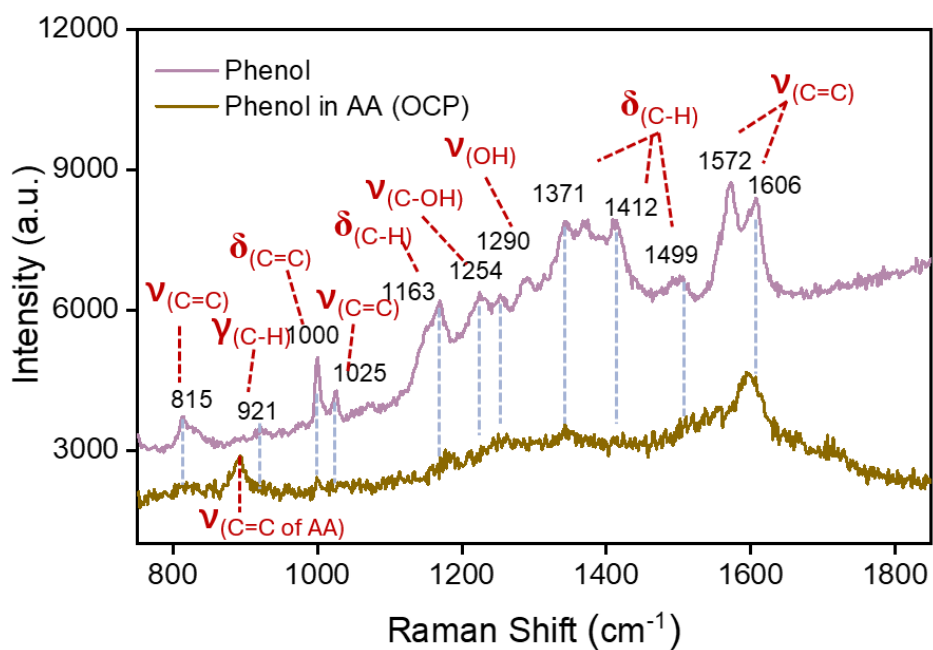

**Fig. S20.** Raman spectra of pure phenol and 100 mM phenol in AA.

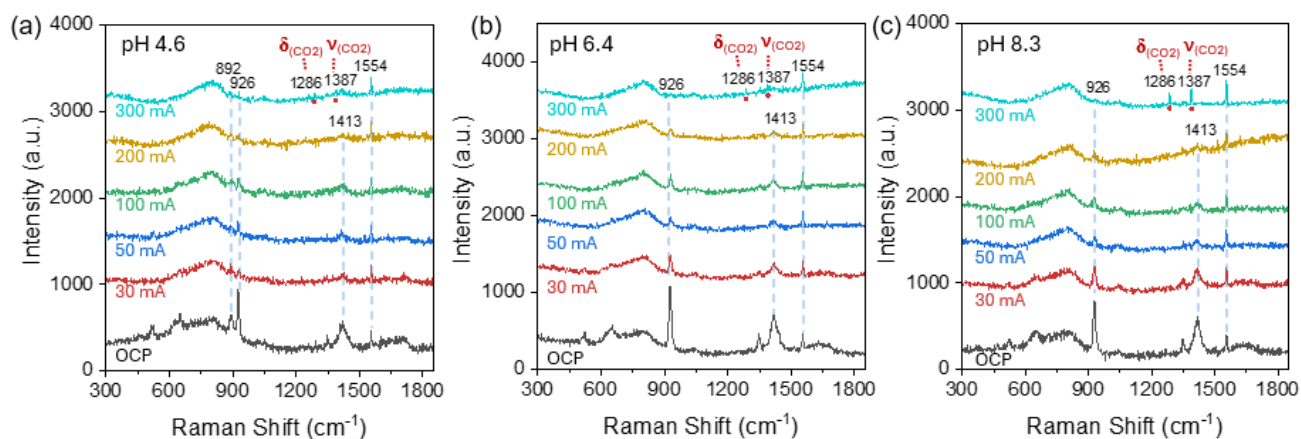

**Fig. S21.** *In-situ* Raman signal variation of 1.0M AA with different currents in various pH.

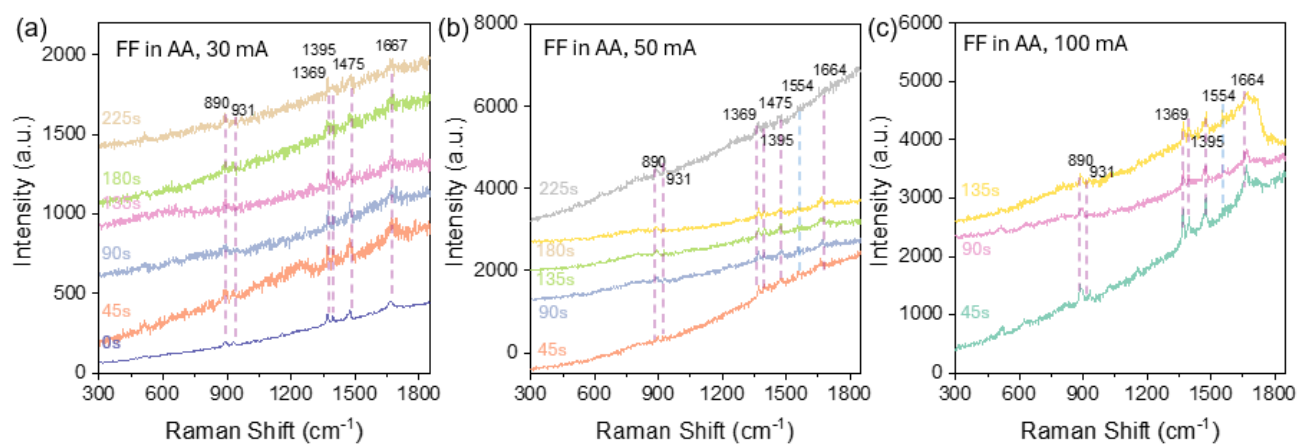

**Fig. S22.** *In-situ* Raman signal variation of FF in 1.0M AA with different currents with time.

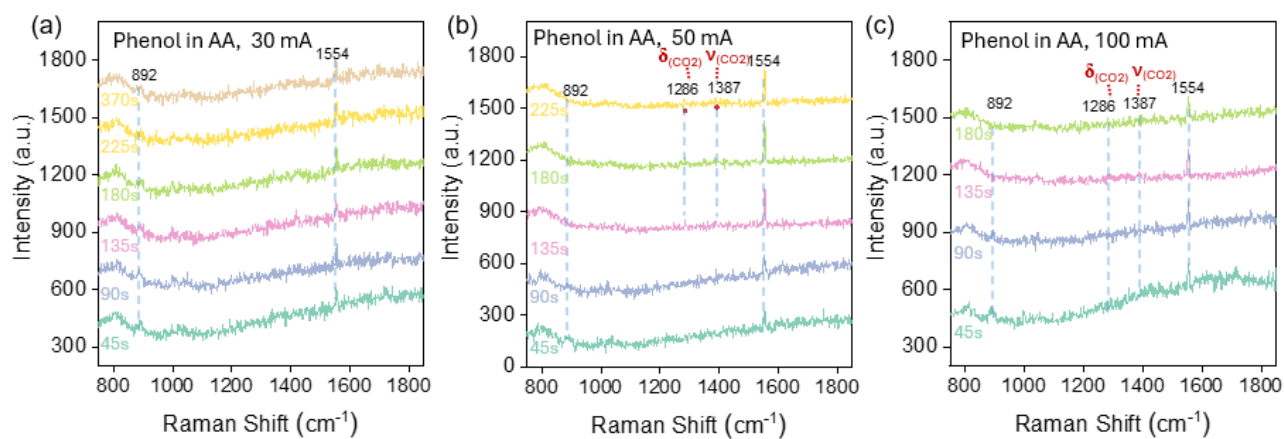

**Fig. S23.** *In-situ* Raman signal variation of phenol in 1.0 M AA with different currents with time.

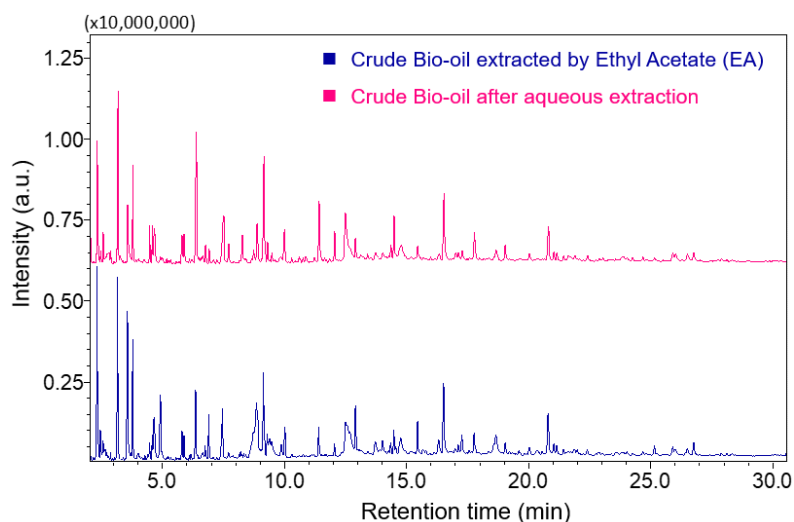

**Fig. S24.** TIC (total ion chromatogram) of crude bio-oil extracted by EA and aqueous-extracted bio-oil.

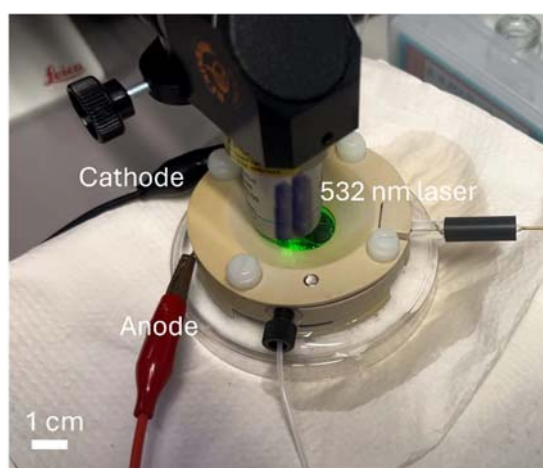

**Fig. S25.** Scheme of the *in-situ* Raman measurement.

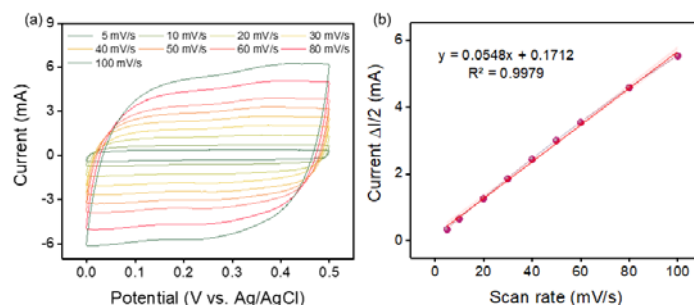

**Fig. S26.** (a) Voltammetry characteristic curves recorded with different sweep velocity using Ag/AgCl as the reference electrode. (b) Diagram of  $\Delta I/2$  vs. sweep velocity. The electrochemically active surface areas (ECSA) were estimated from the electrochemical double-layer capacitance ( $C_{dl}$ ) of the catalytic surface. The  $C_{dl}$  was determined by plotting the  $\Delta I/2$  ( $\Delta I = I_a - I_c$ , where  $I_a$  is the anodic current and  $I_c$  is the cathodic current at the middle voltage) against the scan rate, where the slope is equal to  $C_{dl}$ . The specific capacitance  $C_s = 40 \mu\text{F cm}^{-2}$  is used<sup>17</sup>, and the ECSA is calculated according to  $\text{ECSA} = C_{dl}/C_s$ .

## References

1. C. Urban, J. Xu, H. Sträuber, T. R. dos Santos Dantas, J. Mühlenberg, C. Härtig, L. T. Angenent and F. Harnisch, *Energ. Environ. Sci.*, 2017, **10**, 2231-2244.
2. Y. Peng, Y. Ning, X. Ma, Y. Zhu, S. Yang, B. Su, K. Liu and L. Jiang, *Adv. Func. Mater.*, 2018, **28**, 1800712.
3. J. Meyers, N. Kurig, C. Gohlke, M. Valeske, S. Panitz, F. J. Holzhäuser and R. Palkovits, *ChemElectroChem*, 2020, **7**, 4873-4878.
4. G. Yuan, L. Wang, X. Zhang, R. Luque and Q. Wang, *ACS Sustain. Chem. Eng.*, 2019, **7**, 18061-18066.
5. C. Taube, A. Fischer and M. Beyer, *ChemCatChem*, 2024, **16**, e202400628.
6. N. Baumgarten, B. J. Etzold, P. Löb, J. Magomajew and A. Ziogas, *Chem. Ing. Tech.*, 2024, **96**, 789-800.
7. K. Neubert, M. Schmidt and F. Harnisch, *ChemSusChem*, 2021, **14**, 3097-3109.
8. N. Ahad and A. de Klerk, *Fuel*, 2018, **211**, 415-419.
9. Y. Qiu, J. A. Lopez-Ruiz, G. Zhu, M. H. Engelhard, O. Y. Gutiérrez and J. D. Holladay, *Appl. Catal. B*, 2022, **305**, 121060.
10. Y. Qiu, J. A. Lopez-Ruiz, U. Sanyal, E. Andrews, O. Y. Gutiérrez and J. D. Holladay, *Appl. Catal. B: Environ.*, 2020, **277**, 119277.
11. S. F. Shams, M. Kashefi and C. Schmitz-Antoniak, *New J. Chem.*, 2018, **42**, 3050-3062.
12. M. Hasan, M. Zaki and L. Pasupulety, *Appl. Catal. A*, 2003, **243**, 81-92.
13. E. Kovalev, A. Shalygin, A. Shubin, I. Kozhevnikov, S. Prikhod'ko, N. Y. Adonin, S. Kazarian and O. Martyanov, *J. Mol. Liquids*, 2022, **348**, 118082.
14. M. J. Abplanalp and R. I. Kaiser, *Astrophys. J.*, 2016, **827**, 132.
15. M. Heinen, Z. Jusys and R. J. Behm, *J. Phys. Chem. C*, 2010, **114**, 9850-9864.
16. S. Beyhan, J.-M. Léger and F. Kadirgan, *Appl. Surf. Sci.*, 2014, **321**, 426-431.
17. Y. Qin, T. Yu, S. Deng, X.-Y. Zhou, D. Lin, Q. Zhang, Z. Jin, D. Zhang, Y.-B. He and H.-J. Qiu, *Nat. Commun.*, 2022, **13**, 3784.
